# Supplementary material for: Photoreactions of 2-(furan-2-yl)-3-hydroxy-4H-chromen-4-one and 3-hydroxy-2-(thiophene-2-yl)-4H-chromen-4-one using cyclohexane and acetonitrile as solvents
Source: Royal Society of Chemistry journal article supplement (doi:10.1039/c7pp00106a), 2017-07-13
Supplement: c7pp00106a1.pdf [file c7pp00106a1.pdf]

## "SUPPLEMENTARY INFORMATION"

### INDEX

**Figure S1.** <sup>1</sup>HNMR spectrum of dehydrodimer of FHC.

**Figure S2.** IR Spectrum of dehydrodimer of FHC.

**Figure S3.** LC-MS of dehydrodimer of FHC.

**Figure S4.** <sup>1</sup>HNMR spectrum of anti-dimer of THC.

**Figure S5.** IR Spectrum of anti-dimer of THC..

**Figure S6.** LC-MS of anti-dimer of THC..

**Figure S7.** IR spectrum of 1,2-indandione of THC.

**Figure S8.** GC-MS of 1,2-indandione of FHC.

**Figure S9.** GC-MS of phthalide derivative of FHC.

**Figure S10.** GC-MS of reactant of FHC.

1a

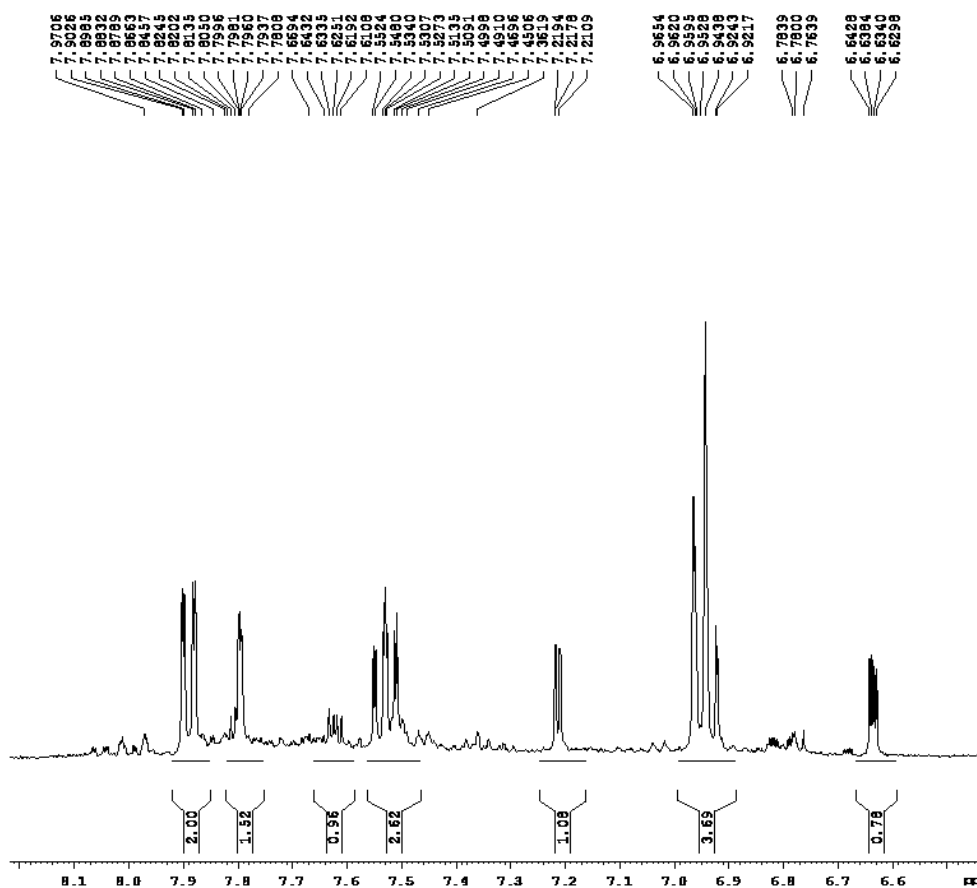

BRUKER  
AVANCE II 400 NMR  
Spectrometer  
SAIF  
Panjab University  
Chandigarh

Current Data Parameters  
NAME Nov04-2015  
EXPNO 31  
PROCNO 1

F2 - Acquisition Parameters  
Date\_ 20151105  
Time 5.52  
INSTRUM spect  
PROBHD 5 mm PABBO BB-  
PULPROG zg30  
TD 65536  
SOLVENT Acetone  
NS 8  
DS 2  
SWH 12019.230 Hz  
FIDRES 0.183399 Hz  
AQ 2.7263477 sec  
RG 256  
DW 41.600 usec  
DE 6.00 usec  
TE 296.0 K  
D1 1.00000000 sec  
TD0 1

==== CHANNEL f1 =====  
NUC1 1H  
P1 10.90 usec  
PL1 -3.00 dB  
SFO1 400.1324710 MHz

F2 - Processing parameters  
SI 32768  
SF 400.1300000 MHz  
WDW EM  
SSB 0  
LB 0.30 Hz  
GB 0  
PC 1.00

manishkumaranul986@gmail.com

Figure S1. <sup>1</sup>H NMR spectrum of dehydromer of FHC.

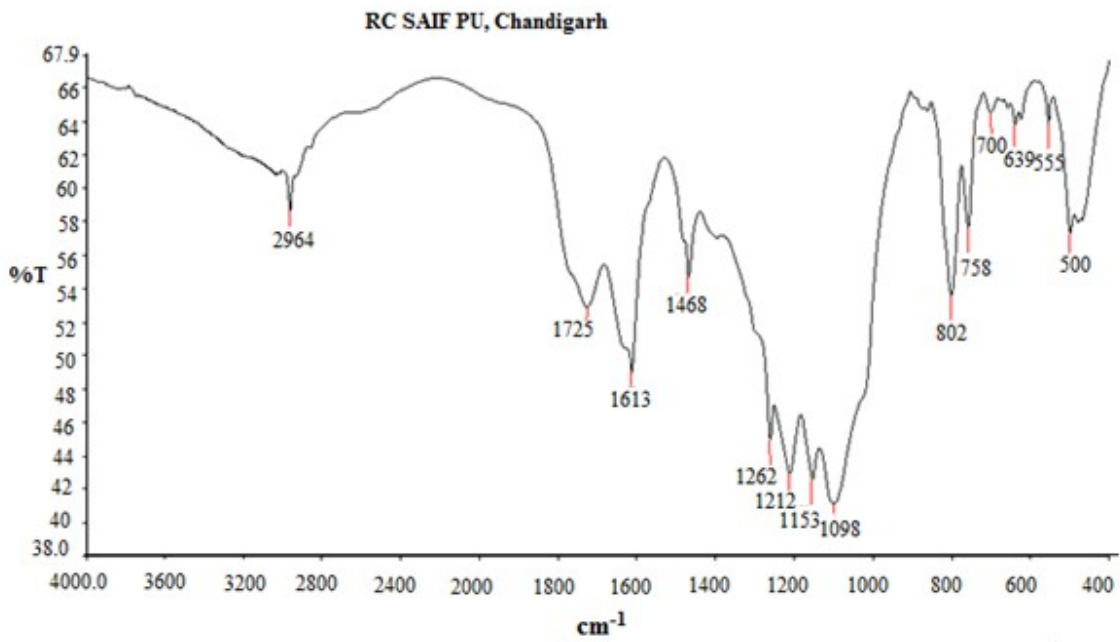

**Figure S2.** IR Spectrum of dehydrodimer of FHC.

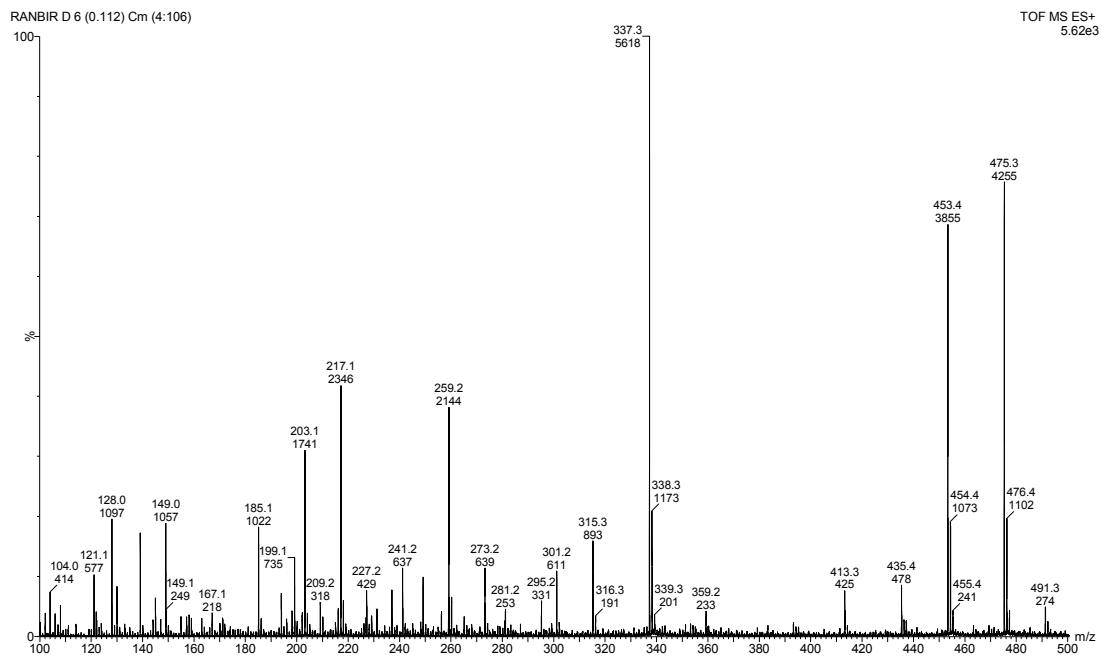

**Figure S3.** LC-MS of dehydrodimer of FHC.

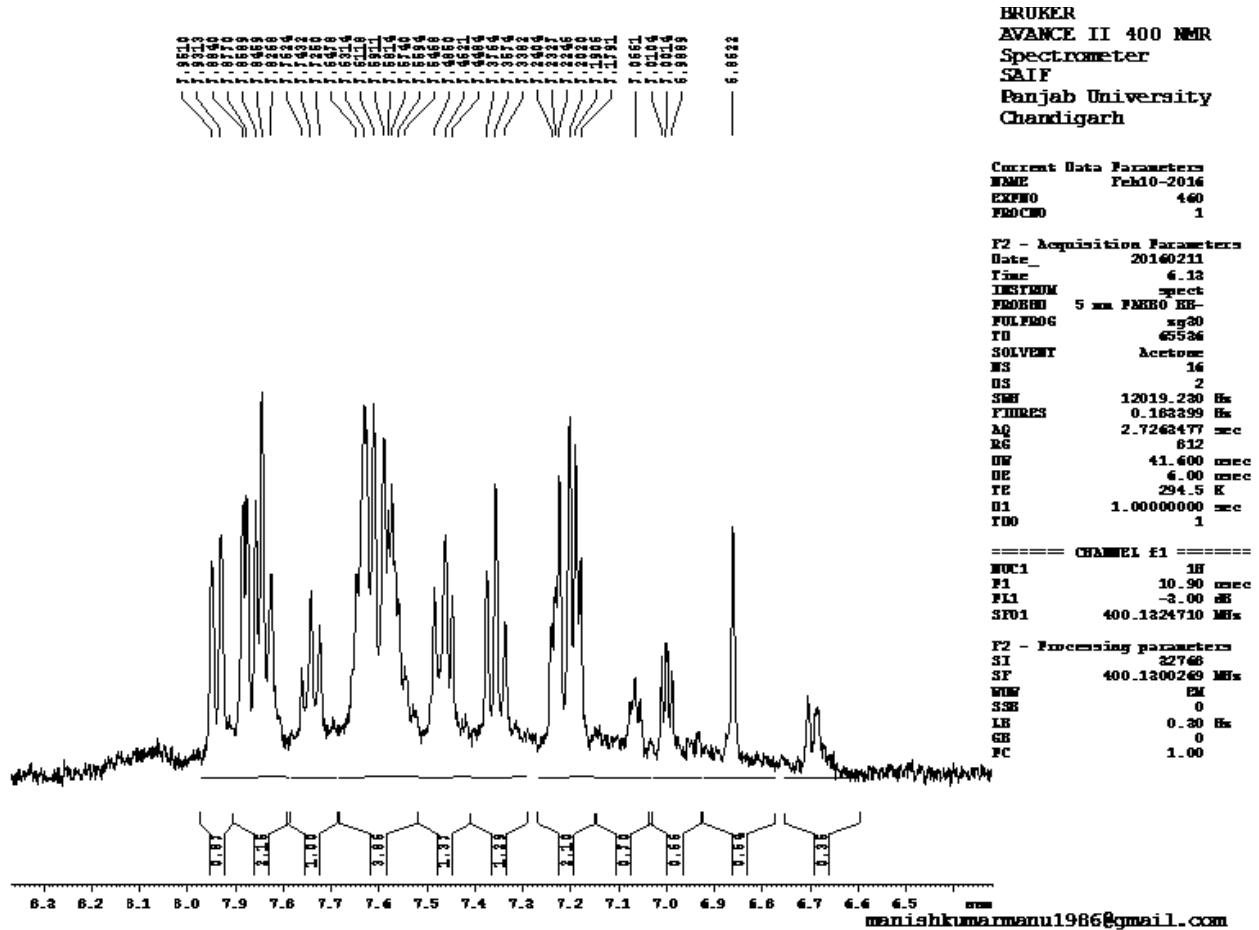

Figure S4. <sup>1</sup>HNMR spectrum of anti-dimer of THC.

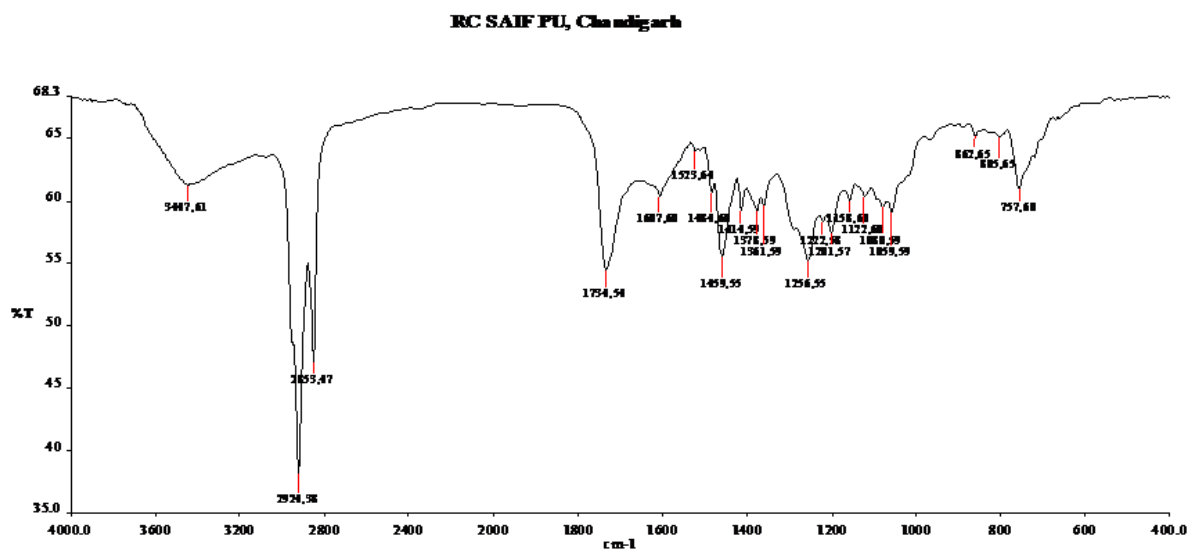

**Figure S5.** IR Spectrum of anti-dimer of THC.

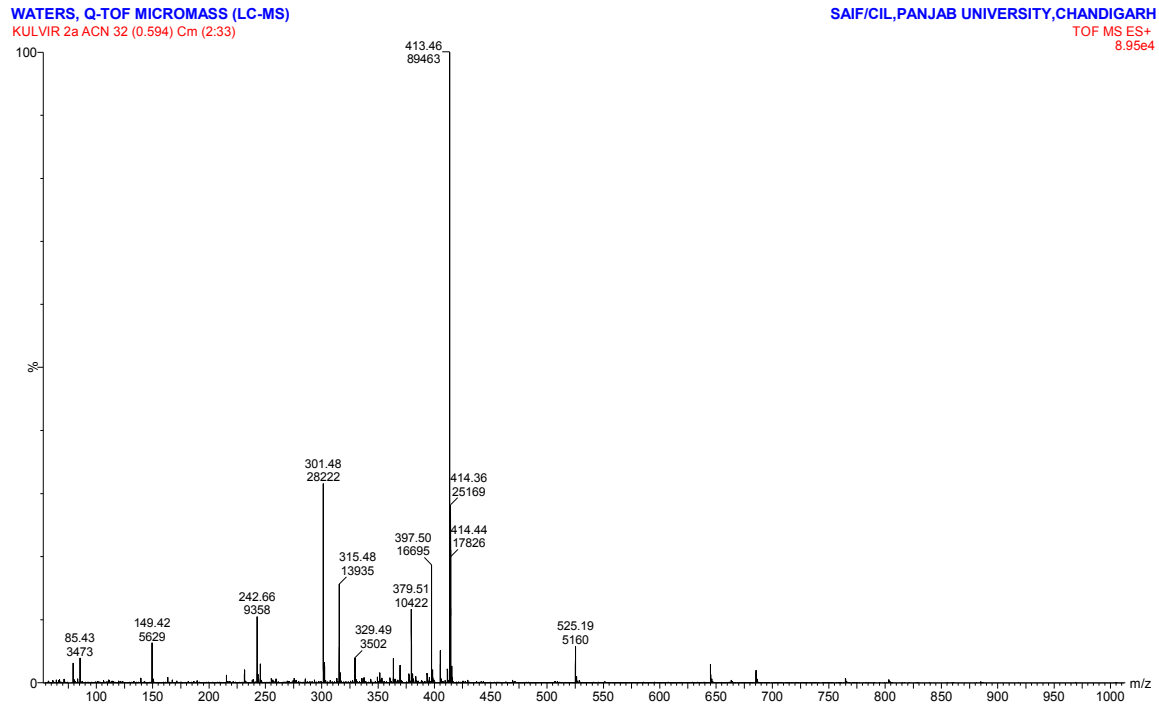

**Figure S6.** LC-MS of anti-dimer of THC.

RC SAIF PU, Chandigarh

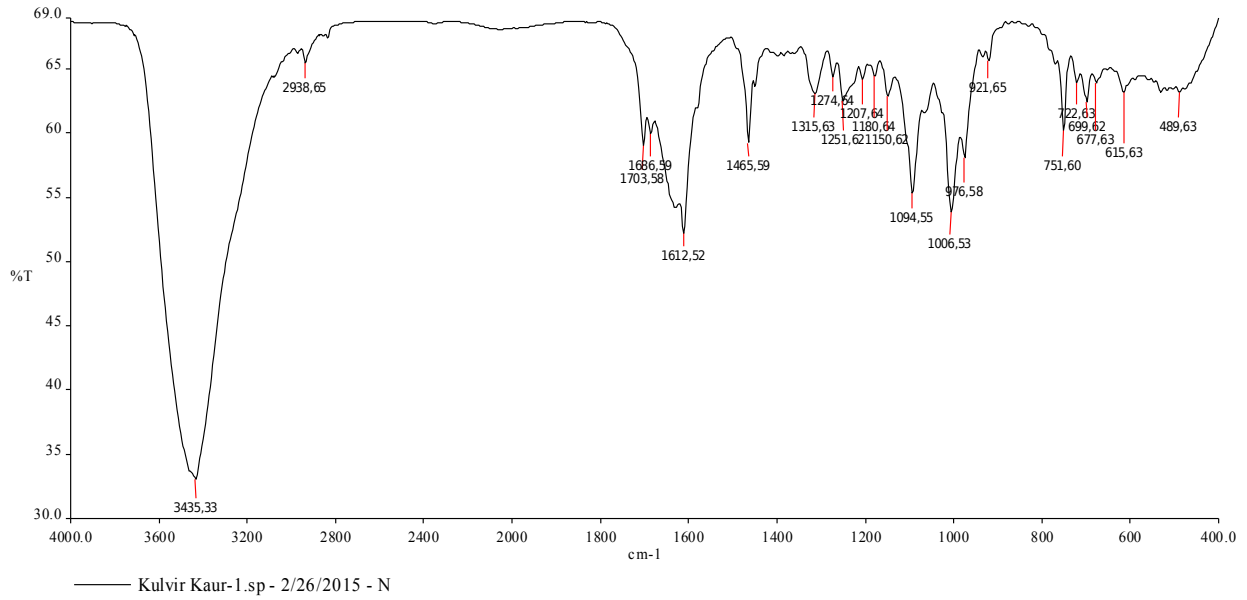

Figure S7. IR spectrum of 1,2-indandione of THC.

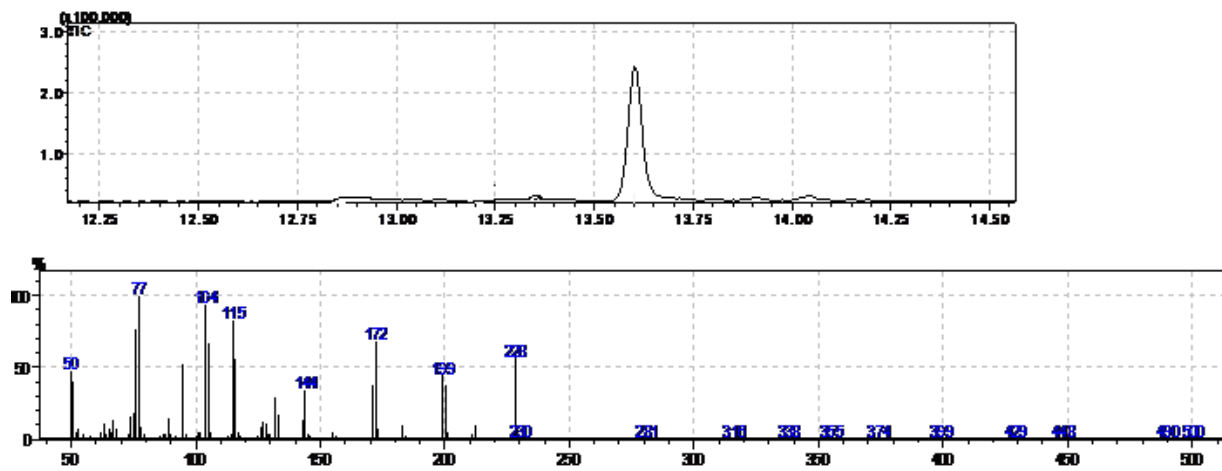

Figure S8. GC-MS of 1,2-indandione of FHC.

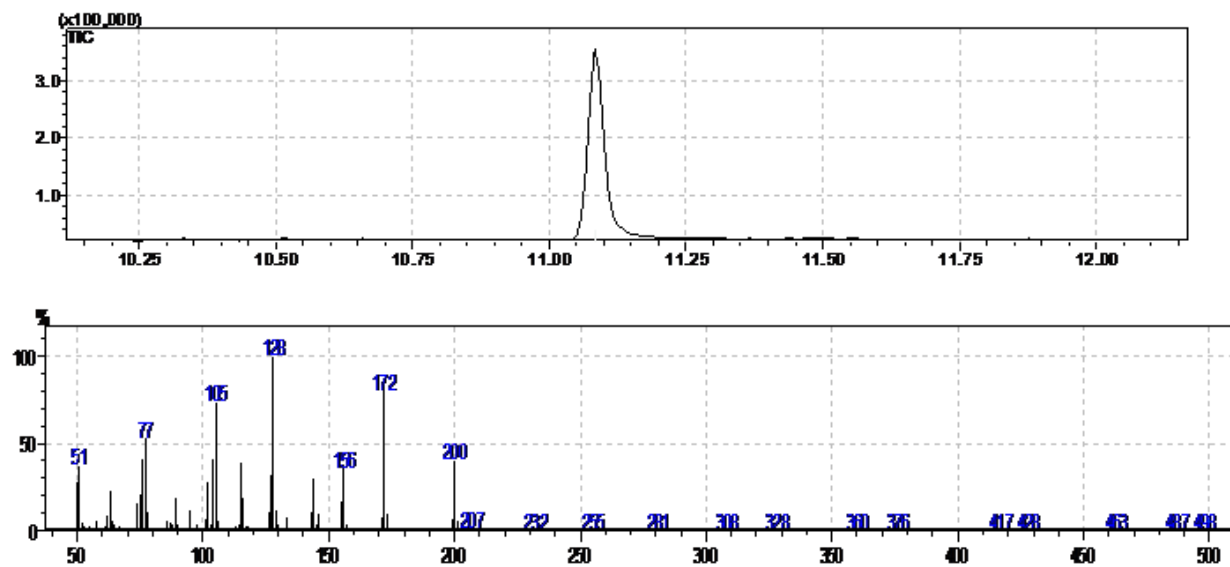

Figure S9. GC-MS of phthalide derivative of FHC.

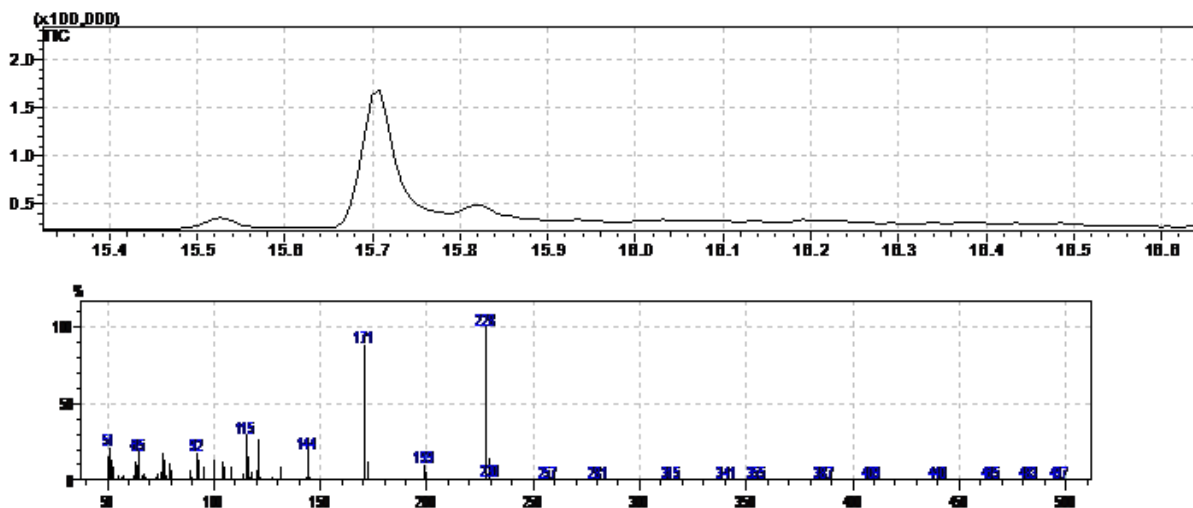

Figure S10. GC-MS of reactant of FHC.
